# Supplementary material
Source: publisher figshare collection journal article supplement (https://frontiersin.figshare.com/ndownloader/files/18197465)
Supplement: Supplementary file [file 18197465]

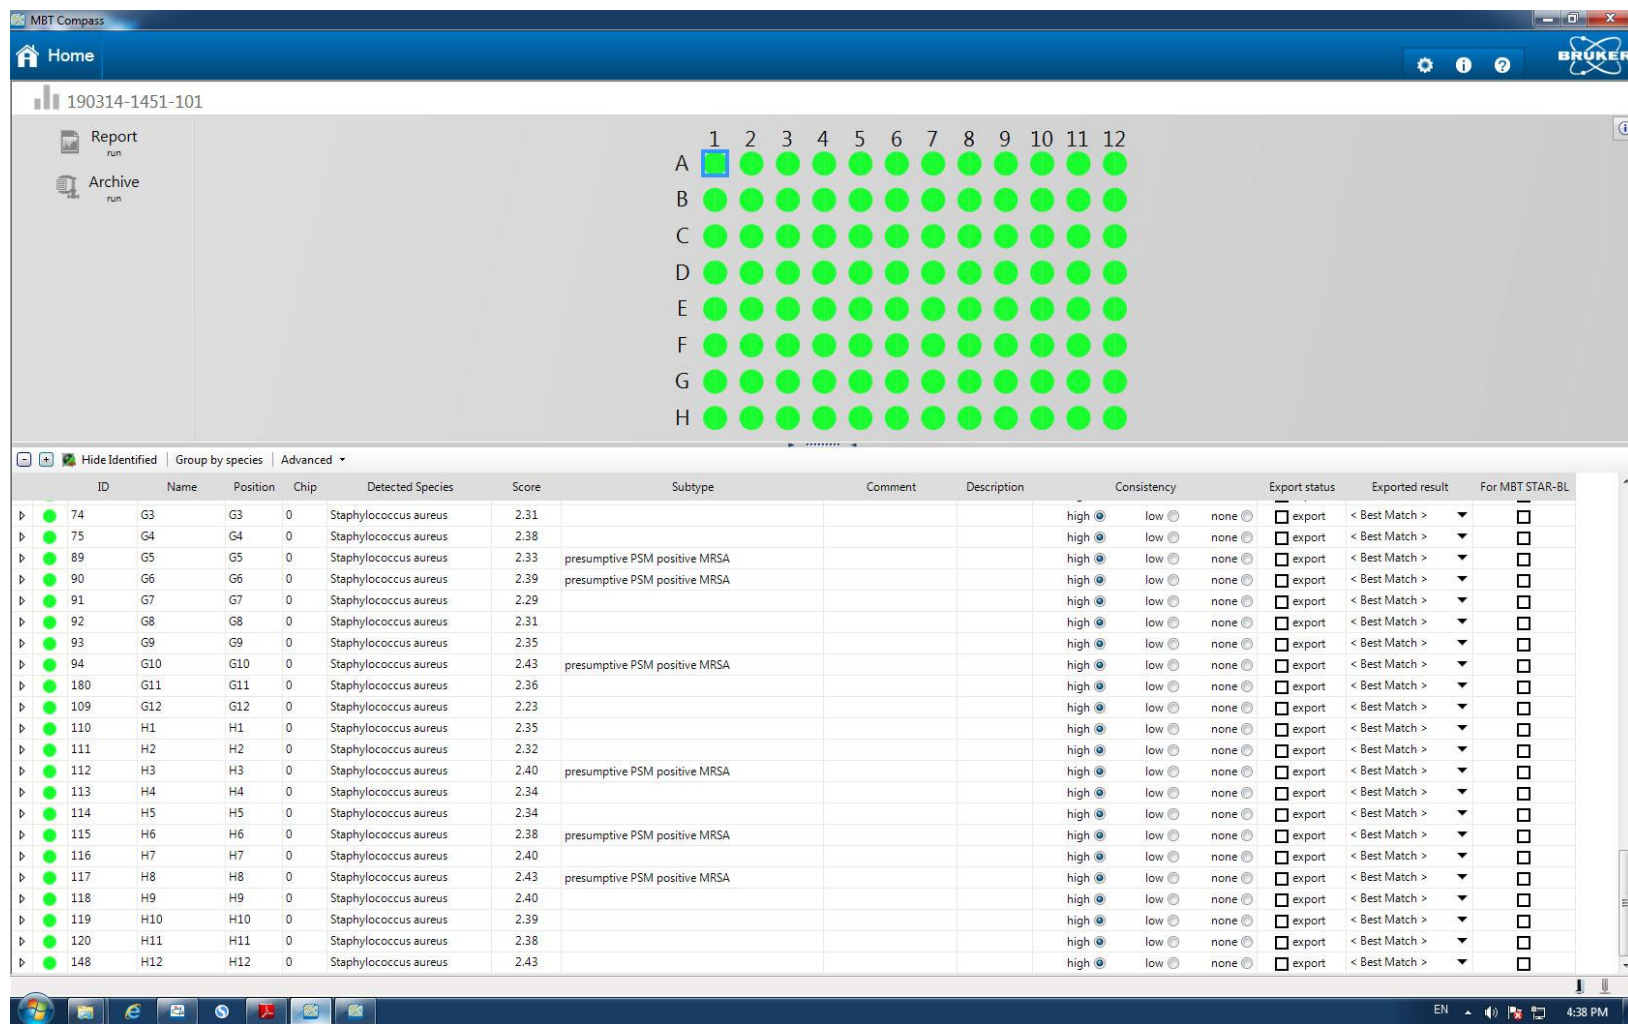

**Fig. S1.** MALDI Biotyper software screenshot with PSM negative and PSM positive *S.aureus* identification results.
